# Supplementary material for: Model Based Optimization of Energy Consumption in Milk Evaporators
Source: MDPI journal article supplement (doi:10.3390/pr12010209), 2024-01-18
Supplement: s1 [file s1]

# **Supplementary material**

## **Model based optimization of energy consumption in milk evaporators**

**Artemis Tsochatzidi <sup>1</sup>, Achilleas L. Arvanitidis <sup>1</sup> and Michael C. Georgiadis <sup>1,\*</sup>**

<sup>1</sup> Department of Chemical Engineering, Aristotle University of Thessaloniki, 54124 Thessaloniki, Greece

\*Correspondence: [mgeorg@auth.gr](mailto:mgeorg@auth.gr)

## 1. Model inputs for each Case

This section presents the model inputs for each evaporator layout (Case). The model inputs may be parameters or degrees of freedom and are presented in Tables S1-S4.

**Table S1.** Case 1 model inputs.

| Definition                   | Symbol | Value       |
|------------------------------|--------|-------------|
| Duration of simulation       | tf     | 1 h         |
| Feed mass flowrate           | Fa     | 10,600 kg/h |
| Feed temperature             | Ta     | 20 °C       |
| Feed mass fraction (water)   | wa,w   | 87.4 wt.%   |
| Feed mass fraction (lactose) | wa,l   | 4.8 wt.%    |
| Feed mass fraction (protein) | wa,p   | 3.4 wt.%    |
| Feed mass fraction (fat)     | wa,f   | 4 wt.%      |
| Feed mass fraction (salt)    | wa,s   | 0.4 wt.%    |
| Steam Pressure               | Ps     | 1.5 bar     |
| Steam Temperature            | Ts     | 125 °C      |
| TVR suction ratio            | SR     | 1.1 bar     |
| TVR outlet pressure          | Pout   | 0.35 bar    |
| FFE Vapor friction factor    | ff,vap | 0.2         |
| Maximum height above plate   | hmax   | 30 cm       |
| Plate diameter               | din    | 2.3 m       |
| Plate thickness              | hplate | 10 mm       |

**Table S2.** Case 2,3 model inputs.

| Definition                                          | Symbol    | Value                                                   |
|-----------------------------------------------------|-----------|---------------------------------------------------------|
| Duration of simulation                              | tf        | 1 h                                                     |
| Feed mass flowrate                                  | Fa        | 1,000 kg/h                                              |
| Feed temperature                                    | Ta        | 55 °C                                                   |
| Feed mass fraction (water)                          | wa,w      | 87.4 wt.%                                               |
| Feed mass fraction (lactose)                        | wa,l      | 4.8 wt.%                                                |
| Feed mass fraction (protein)                        | wa,p      | 3.4 wt.%                                                |
| Feed mass fraction (fat)                            | wa,f      | 4 wt.%                                                  |
| Feed mass fraction (salt)                           | wa,s      | 0.4 wt.%                                                |
| Steam Pressure                                      | Ps        | 1.5 bar                                                 |
| Steam Temperature                                   | Ts        | 128 °C                                                  |
| TVR suction ratio                                   | SR        | 1.1 bar                                                 |
| TVR outlet pressure                                 | Pout      | 0.35 bar                                                |
| FFE Vapor friction factor                           | ff,vap    | 0.2                                                     |
| Maximum height above plate                          | hmax      | 25 mm                                                   |
| Plate diameter                                      | din       | 1.3 m                                                   |
| Plate thickness                                     | hplate    | 10 mm                                                   |
| Plate surface roughness                             | rplate    | 10 µm                                                   |
| Number of liquid holes                              | Nliq hole | 100                                                     |
| Diameter of liquid holes                            | dliq hole | 5 mm                                                    |
| Diameter of evaporator body                         | dout      | 1.4 m                                                   |
| Height of outer rim                                 | hrim      | 40 mm                                                   |
| Number of evaporator tubes                          | N         | 35                                                      |
| Tube inner diameter                                 | Di        | 0.0508 m                                                |
| Tube length                                         | L         | 6 m                                                     |
| Overall heat transfer coefficient (evaporator body) | U         | 2500 J·m <sup>-2</sup> s <sup>-1</sup> °C <sup>-1</sup> |
| Number of preheater tubes                           | Npt       | 1                                                       |
| Diameter of preheater tube                          | Dpt       | 30 mm                                                   |
| Length of preheater tubes                           | Lpt       | 1 m                                                     |
| Overall heat transfer coefficient (preheater tubes) | Upt       | 3000 J·m <sup>-2</sup> s <sup>-1</sup> °C <sup>-1</sup> |

**Table S3.** Case 4 model inputs.

| Definition                                          | Symbol    | Value                                                   |
|-----------------------------------------------------|-----------|---------------------------------------------------------|
| Duration of simulation                              | tf        | 1 h                                                     |
| Feed mass flowrate                                  | Fa        | 1,000 kg/h                                              |
| Feed temperature                                    | Ta        | 50 °C                                                   |
| Feed mass fraction (water)                          | wa,w      | 87.4 wt.%                                               |
| Feed mass fraction (lactose)                        | wa,l      | 4.8 wt.%                                                |
| Feed mass fraction (protein)                        | wa,p      | 3.4 wt.%                                                |
| Feed mass fraction (fat)                            | wa,f      | 4 wt.%                                                  |
| Feed mass fraction (salt)                           | wa,s      | 0.4 wt.%                                                |
| MVR compression ratio                               | CR        | 1.4                                                     |
| MVR mechanical efficiency                           | em        | 0.5                                                     |
| FFE Vapor friction factor                           | ff,vap    | 0.2                                                     |
| Maximum height above plate                          | hmax      | 25 mm                                                   |
| Plate diameter                                      | din       | 1.3 m                                                   |
| Plate thickness                                     | hplate    | 10 mm                                                   |
| Plate surface roughness                             | rplate    | 10 µm                                                   |
| Number of liquid holes                              | Nliq hole | 100                                                     |
| Diameter of liquid holes                            | dliq hole | 5 mm                                                    |
| Diameter of evaporator body                         | dout      | 1.4 m                                                   |
| Height of outer rim                                 | hrim      | 40 mm                                                   |
| Number of evaporator tubes                          | N         | 35                                                      |
| Tube inner diameter                                 | Di        | 0.0508 m                                                |
| Tube length                                         | L         | 6 m                                                     |
| Overall heat transfer coefficient (evaporator body) | U         | 2500 J·m <sup>-2</sup> s <sup>-1</sup> °C <sup>-1</sup> |

**Table S4.** Case 5 model inputs.

| Definition                                          | Symbol    | Value                                                   |
|-----------------------------------------------------|-----------|---------------------------------------------------------|
| Duration of simulation                              | tf        | 1 h                                                     |
| Feed mass flowrate                                  | Fa        | 16,000 kg/h                                             |
| Feed temperature                                    | Ta        | 55 °C                                                   |
| Feed mass fraction (water)                          | wa,w      | 87.4 wt.%                                               |
| Feed mass fraction (lactose)                        | wa,l      | 4.9 wt.%                                                |
| Feed mass fraction (protein)                        | wa,p      | 3.5 wt.%                                                |
| Feed mass fraction (fat)                            | wa,f      | 3.5 wt.%                                                |
| Feed mass fraction (minerals)                       | wa,m      | 0.7 wt.%                                                |
| Steam Pressure                                      | Ps        | 3 bar                                                   |
| Steam Temperature                                   | Ts        | 133 °C                                                  |
| TVR suction ratio                                   | SR        | 0.5                                                     |
| TVR outlet pressure                                 | Pout      | 0.35 bar                                                |
| FFE Vapor friction factor                           | ff,vap    | 0.2                                                     |
| Maximum height above plate                          | hmax      | 0.4 m                                                   |
| Plate diameter                                      | din       | 2.3 m                                                   |
| Plate thickness                                     | hplate    | 10 mm                                                   |
| Plate surface roughness                             | rplate    | 10 µm                                                   |
| Number of liquid holes                              | Nliq hole | 150                                                     |
| Diameter of liquid holes                            | dliq hole | 5 mm                                                    |
| Diameter of evaporator body                         | dout      | 2.4 m                                                   |
| Height of outer rim                                 | hrim      | 40 mm                                                   |
| Number of evaporator tubes                          | N         | 100/131/111/264                                         |
| Tube inner diameter                                 | Di        | 0.0508 m                                                |
| Tube length                                         | L         | 10 m                                                    |
| Overall heat transfer coefficient (evaporator body) | U         | 2500 J·m <sup>-2</sup> s <sup>-1</sup> °C <sup>-1</sup> |
| Split fraction                                      | SF        | 0.4                                                     |

## 2. GSA factors for each Case

This section provides a detailed description of the factors used in the Global System Analysis (GSA) for each studied Case. The Factors are described in Tables S5-S8. Along with their lower and upper bounds and the assigned probability distribution.

**Table S5.** Uncertainty analysis factors – Case 1.

| Variable name              | Unit | Lower bound | Upper bound | Probability distribution |
|----------------------------|------|-------------|-------------|--------------------------|
| TVR – Pressure (discharge) | bar  | 0.3         | 0.35        | Uniform distribution     |
| TVR – Suction ratio        | -    | 0.4         | 2           | Uniform distribution     |
| Feed Temperature           | °C   | 40          | 60          | Uniform distribution     |

**Table S6.** Uncertainty analysis factors – Cases 2 and 3.

| Variable name              | Unit | Lower bound | Upper bound | Probability distribution |
|----------------------------|------|-------------|-------------|--------------------------|
| TVR – Pressure (discharge) | bar  | 0.3         | 0.35        | Uniform distribution     |
| TVR – Suction ratio        | -    | 0.4         | 2           | Uniform distribution     |
| Feed Temperature           | °C   | 40          | 60          | Uniform distribution     |

**Table S7.** Uncertainty analysis factors – Case 4.

| Variable name           | Unit | Lower bound | Upper bound | Probability distribution |
|-------------------------|------|-------------|-------------|--------------------------|
| MVR – Compression ratio | -    | 1           | 1.4         | Uniform distribution     |
| Feed Temperature        | °C   | 40          | 60          | Uniform distribution     |

**Table S8.** Uncertainty analysis factors – Case 5.

| Variable name       | Unit | Lower bound | Upper bound | Probability distribution |
|---------------------|------|-------------|-------------|--------------------------|
| Split fraction      | -    | 0.4         | 0.7         | Uniform distribution     |
| TVR – Suction ratio | -    | 0.4         | 0.8         | Uniform distribution     |
| Feed Temperature    | °C   | 40          | 70          | Uniform distribution     |

### 3. Dynamic optimization decision variables for each Case

This section contains details about the optimization variables selected for the dynamic optimization of each studied layout. Tables S9-S11 showcase the control variables, a range of acceptable values as well as type of the acceptable values for each optimization scenario.

**Table S9.** optimization variables specifications – Case 1.

| Variable name              | Unit | Lower bound | Upper bound | Type/Allowable values         |
|----------------------------|------|-------------|-------------|-------------------------------|
| <b>Scenario 1,2,3,4,6</b>  |      |             |             |                               |
| TVR – Pressure (discharge) | bar  | 0.3         | 0.35        | Time invariant/ Continuous    |
| TVR – Suction ratio        | -    | 0.4         | 2           | Time invariant/ Continuous    |
| Feed Temperature           | °C   | 20          | 60          | Time invariant/ Continuous    |
| <b>Scenario 5</b>          |      |             |             |                               |
| FFE1 tube inner diameter   | m    | 0.0254      | 0.0508      | Time invariant/<br>Enumerated |
| FFE1 tube length           | m    | 5           | 20          | Time invariant/ Continuous    |
| FFE2 tube inner diameter   | m    | 0.0254      | 0.0508      | Time invariant/<br>Enumerated |
| FFE2 tube length           | m    | 5           | 20          | Time invariant/ Continuous    |

**Table S10.** Optimization variables specifications – Case 2,3.

| Variable name              | Unit | Lower bound | Upper bound | Type/Allowable values         |
|----------------------------|------|-------------|-------------|-------------------------------|
| <b>Scenario 1,2,3,4,6</b>  |      |             |             |                               |
| TVR – Pressure (discharge) | bar  | 0.3         | 0.35        | Time invariant/ Continuous    |
| TVR – Suction ratio        | -    | 0.4         | 2           | Time invariant/ Continuous    |
| Feed Temperature           | °C   | 40          | 60          | Time invariant/ Continuous    |
| <b>Scenario 5</b>          |      |             |             |                               |
| FFE1 tube inner diameter   | m    | 0.0254      | 0.0508      | Time invariant/<br>Enumerated |
| FFE1 tube length           | m    | 0.5         | 10          | Time invariant/ Continuous    |
| FFE2 tube inner diameter   | m    | 0.0254      | 0.0508      | Time invariant/<br>Enumerated |
| FFE2 tube length           | m    | 0.5         | 10          | Time invariant/ Continuous    |

**Table S11.** Optimization variables specifications – Case 4.

| <b>Variable name</b>       | <b>Unit</b> | <b>Lower bound</b> | <b>Upper bound</b> | <b>Type/Allowable values</b>  |
|----------------------------|-------------|--------------------|--------------------|-------------------------------|
| <b>Scenario 1,2,3,4,6</b>  |             |                    |                    |                               |
| MVR – Adiabatic efficiency | -           | 0.2                | 1                  | Time invariant/ Continuous    |
| MVR – Compression ratio    | -           | 1                  | 1.45               | Time invariant/ Continuous    |
| Feed Temperature           | °C          | 40                 | 60                 | Time invariant/ Continuous    |
| <b>Scenario 5</b>          |             |                    |                    |                               |
| FFE1 tube inner diameter   | m           | 0.0254             | 0.0508             | Time invariant/<br>Enumerated |
| FFE1 tube length           | m           | 0.5                | 10                 | Time invariant/ Continuous    |
